# Supplementary material for: Hydrochars Derived from Spent Coffee Grounds as Zn Bio-Chelates for Agronomic Biofortification
Source: MDPI journal article supplement (doi:10.3390/su151310700), 2023-07-07
Supplement: s1 [file s1]

Supplementary material for:

## Hydrochars Derived from Spent Coffee Grounds as Zn Bio-Chelates for Agronomic Biofortification

Leslie Lara-Ramos <sup>1,\*</sup>, Ana Cervera-Mata <sup>2</sup>, Jesús Fernández-Bayo <sup>2</sup>,  
Miguel Navarro-Alarcón <sup>3</sup>, Gabriel Delgado <sup>2</sup> and Alejandro Fernández-Arteaga <sup>1</sup>

<sup>1</sup> Department of Chemical Engineering, University of Granada, 18071 Granada, Spain

<sup>2</sup> Department of Soil Science and Agricultural Chemistry, University of Granada, 18071 Granada, Spain; anacervera@ugr.es (A.C.-M.); jdfbayo@ugr.es (J.F.-B.); gdelgado@ugr.es (G.D.)

<sup>3</sup> Department of Nutrition and Bromatology, University of Granada, 18071 Granada, Spain; nalarcon@ugr.es

\* Correspondence: llara@correo.ugr.es

**Table S1.** Zn concentration and quantity of bio-product in each sample.

| Sample    | Zn (mg kg <sup>-1</sup> soil) | Bio-product (%) |
|-----------|-------------------------------|-----------------|
| Control A | 0                             | 0               |
| Control B | 10.00                         | 0               |
| SCG-1     | 0.02                          | 0.17            |
| H160-1    | 0.06                          | 0.57            |
| H200-1    | 0.35                          | 3.01            |
| SCG-Zn-1  | 10.00                         | 0.17            |
| H160-Zn-1 | 10.00                         | 0.57            |
| H200-Zn-1 | 10.00                         | 3.01            |
| SCG-2     | 0.05                          | 0.5             |
| H160-2    | 0.05                          | 0.5             |
| H200-2    | 0.06                          | 0.5             |
| SCG-Zn-2  | 30.05                         | 0.5             |
| H160-Zn-2 | 8.74                          | 0.5             |
| H200-Zn-2 | 1.66                          | 0.5             |

Control A: only NPK; Control B: commercial chelate + NPK; SCG: spent coffee grounds;

H160: hydrochar at 160 °C; H200: hydrochar at 200 °C; SCG-Zn: SCG bio-chelates;

H160-Zn: H160 bio-chelates; H200-Zn: H200 bio-chelates.

Different numbers in the samples indicate the assay: (1) bio-chelates at 10 mg kg<sup>-1</sup> soil;  
(2) 0.5% of bio-product.
